# Supplementary material for: Oxidation of thiols with molecular oxygen catalyzed by cobalt(ii) phthalocyanines in ionic liquidElectronic supplementary information (ESI) available: experimental. See http://www.rsc.org/suppdata/cc/b3/b305888c/
Source: Royal Society of Chemistry journal article supplement (doi:10.1039/b305888c), 2003-01-01
Supplement: b305888c.doc [file b305888c.doc]

# **Supplementary Data**

**Oxidation of Thiols with Molecular Oxygen Catalyzed by Cobalt(II) Phthalocyanines in Ionic Liquid**

# S.M.S. Chauhan*, Anil Kumar and K.A. Srinivas

# *Department of Chemistry, University of Delhi, Delhi 110 007, India*

# *Email: smschauhan@chemistry.du.ac.in*

General: Electronic spectra were recorded on shimadzu UV 260 and Varian Cary 100 spectrophotometer. 1H NMR spectra were recorded on a Bruker 300 MHz spectrometer. Melting points were determined on a Thomas Hoover Unimelt capillary melting apparatus and are uncorrected. HPLC analysis was carried out on Waters equipped with a photodiode array detector (Model 991) on a -Bondapak C18 reverse phase column (3.9  300 mm) using methonol: water (60:40, v/v) as eluent. The flow rate was 0.5 ml/min and monitored at 235. Phthalic anhydride and 3-nitrophthalic anhydride, urea, CoCl2 were obtained from Sisco Research Laboratories (SRL), India. N-Butyl bromide was obtained from SD Fine Chemicals, India.

Synthesis of Co(II) phthalocyanine [CoPc] and Co(II) tetra-3-nitrophthalocyanine [CoTNPc]

A mixture of phthalic anhydride (1g, 0.068 mol), urea (5.2 g, 0.118 mol), coblat(II) chloride (0.71 g, 0.003 mol) and ammonium molybdate (10 mg) in nitrobenzene (200 mL) was heated at 180 oC for 1 h. The reaction mixture was cooled to room temperature and titurated with dilute hydrochloric acid. The solid product was dissolved in dilute sodium hydroxide. The resulting mixture was filtered and the residue again boiled with dilute hydrochloric acid, filtered and thoroughly washed with water to give the required Co(II) phthalocyanine in 2.0 g (31.0% yield)

UV-vis (DMF) max nm (10-3, M-1cm-1): 660.0 (83.0), 600.0 (3.5).

Co(II) tetra-3-nitrophthalocyanine was prepared starting from 3-nitrophthalic anhydride using similar method as described above.

UV-vis (DMF) max nm (10-3, M-1cm-1): 668.0 (89.5), 601.0 (4.2).

**Synthesis of 1-butyl-3-methylimidazolium tetrafluoroborate [bmim][BF4] ionic liquid**

In a 100 mL round-bottom flask, 1-methylimidazole (8.21 g, 0.1 mol, dried over MgSO4) was mixed with n-butyl bromide (16.44 g, 0.12 mol) and allowed to reflux for 24 h at 70 oC. The excess n-butyl bromide was distilled off and the residue was extracted thoroughly 2-3 times (50 ml each) with diethyl ether to remove the unreacted starting materials. A clear yellow viscous oily liquid of 1-butyl-3-methylimidazolium bromide was obtained in 94% yield (13.0 g).

The above-obtained [bmim][BF4] was dissolved in acetone (50 ml) and stirred with excess NaBF4 at room temperature for 24 h to exchange tha anion. The reaction mixture was filtered off to remove the unreacted and excess NaBF4. The acetone was evaporated on rotary evaporatory under reduced pressure and vaccum dried to give [bmim][BF4].

1H NMR (CDCl3, 300 MHz,  ppm): 8.98 (s, 1H, C-2H), 7.49 (s, 2H, C-4H & C-5H), 4.21 (t, J = 7.11 Hz, 2H, NCH2), 4.01 (s, 3H, NCH3), 1.85 (p, J = 7.20 Hz, 2H, NCH2CH2), 1.35 (sexet, J = 7.20 Hz, 2H, CH2CH3), 0.91 (t, J = 7.12 Hz, 3H, CH3).

13C NMR (CDCl3, 300 MHz,  ppm): 13.27, 19.23, 31.87, 36.13, 49.57, 122.49, 123.79 and 136.12.

UV-visible spectroscopic studies of the oxidation of thiols with molecular oxygen catalyzed by Co(II) phthalocyanine:

To a solution of ionic liquid (2 mL), CoPc or CoTNPc (1 mmole) was added and stirred at room temperature for 15 minutes to dissolve CoPc of CoTNPc completely in ionic liquid [bmim][BF4]. An aliquot of 40 l of CoPc was drawn and injected into 1.0 ml of DMF in an UV-cell. The solution was thoroughly shaken and the UV-visible spectrum of transparent solution was recorded. The UV-visible spectrum of Co(II) phthalocyanine in DMF has two characteristic peaks at 660.0 and 600.0 nm, which is shifted to 664.0 and 601.0 nm in ionic liquid. When molecular oxygen was bubbled into the reaction mixture in absence of thiol, a new peak at 426.0 nm is appeared. The addition of thiol to Co(II) phthalocyanine in ionic liquid is resulted in the appearance of new peaks at 677.0, 555.0 and 507.0 nm, which may be due to the coordination of thiol to the central metal atom i.e. cobalt. When molecular oxygen is bubbled into the reaction mixture, a new characteristic absorption peak at 426.0 nm is appeared in the UV-visible spectrum which may be attributed to the formation of Co(I)-O2 complex. The absorption maxima at 426.0 nm is gradually increased with respect to time and decreased after 30 min, indicating that the oxidation process has been intiated by the reaction of Co(I)-O2 with thiol which results in the formation of RS**.**. The combination of two RS**.** leads to the formation of disulfide. Further the peaks at 555.0 and 507.0 nm have disappeared after the completion of the reaction which shows the complete consumption of thiol. It is also noteworthy to mention the changes in colours during the course of the reaction. The bluish green colour of Co(II) phthalocyanine dissolved in ionic liquid has changed to violet upon addition of thiol which remained same during the process of oxidation (i.e after bubbling molecular oxygen). However after completion of the reaction, the violet colour has changed to its original bluish green colour.


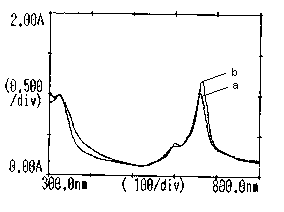


**Fig. 1**: UV-visible spectra of Co(II)phthalocyanine (**1a**) in a) DMF and b) ionic liquid [bmim][BF4]


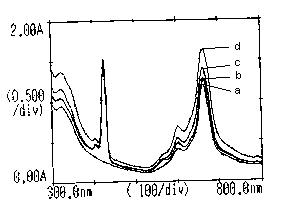


**Fig. 2**: UV-visible spectra of Co(II) phthalocyanine (**1a**) in ionic liquid [bmim][BF4] in presence of molecular oxygen a) 0 min, b) 10 min, c) 20 min and d) 30 min.


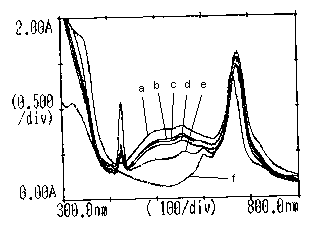


a

**Fig. 3**: UV-visible spectra of Co(II) phthalocyanine (**1a**) in ionic liquid [bmim][BF4] in presence of thiophenol and molecular oxygen a) 0 min, b) 10 min, c) 20 min, d) 30 min, e) 45 min and f) 60 min.
